# Supplementary material for: Comparison of two isolation methods of tobacco-derived extracellular vesicles, their characterization and uptake by plant and rat cells
Source: PubMed Central journal article supplement (PMC9674704; doi:10.1038/s41598-022-23961-9), 2022-11-18
Supplement: 41598_2022_23961_MOESM1_ESM.pdf [file 41598_2022_23961_MOESM1_ESM.pdf]

# Comparison of two isolation methods of tobacco-derived extracellular vesicles, their characterization and uptake by plant and rat cells

Michaela Kocholata<sup>1,\*</sup>, Michaela Prusova<sup>1</sup>, Hana Auer Malinska<sup>2</sup>, Jan Maly<sup>1</sup> and Olga Janouskova<sup>1</sup>

<sup>1</sup>Centre for Nanomaterials and Biotechnology, Faculty of Science, Jan Evangelista Purkyně University in Usti nad Labem, Usti nad Labem, Czech Republic

<sup>2</sup>Department of Biology, Faculty of Science, Jan Evangelista Purkyně University in Usti nad Labem, Usti nad Labem, Czech Republic

\*Correspondence: kocholata.michaela@gmail.com

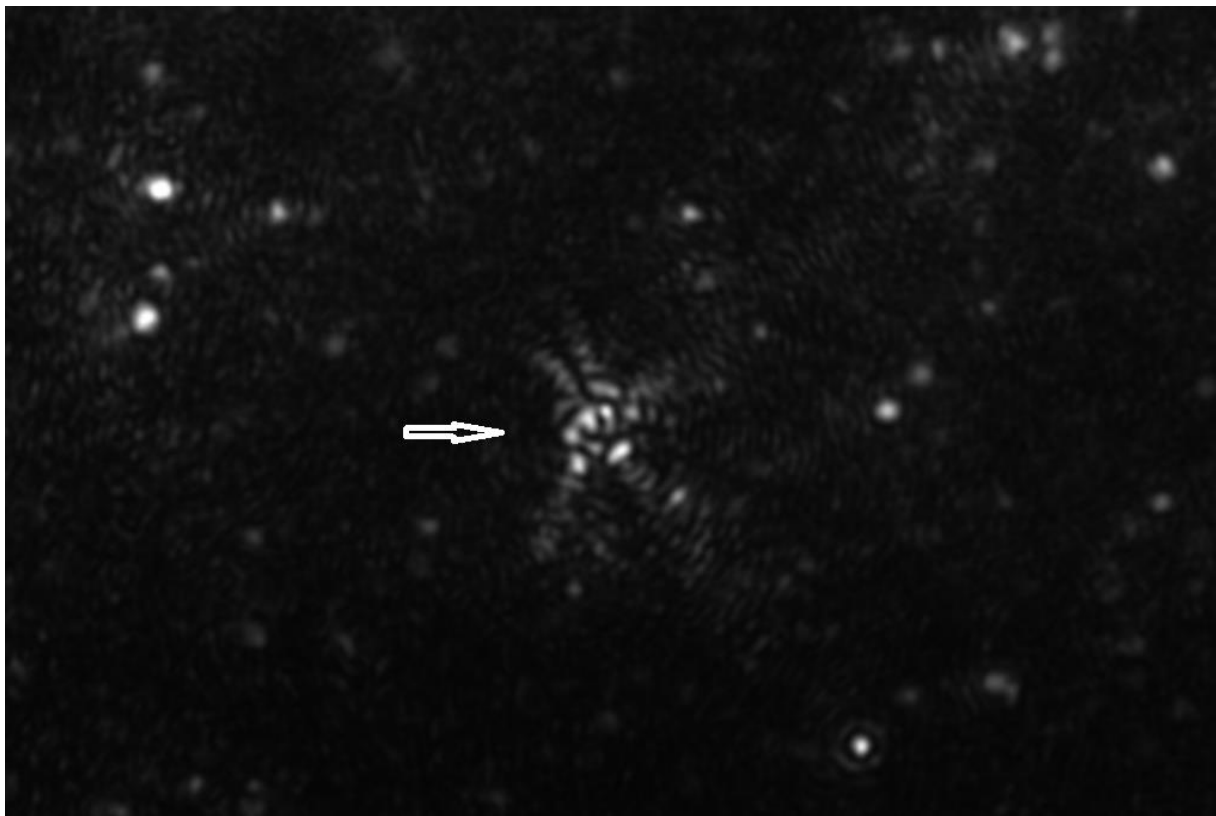

**Supplementary Fig. S1:** *A crop of a video captured by NanoSight NS300 (Malvern Instruments) showing the presence of extracellular vesicles aggregate (marked with an arrow).*

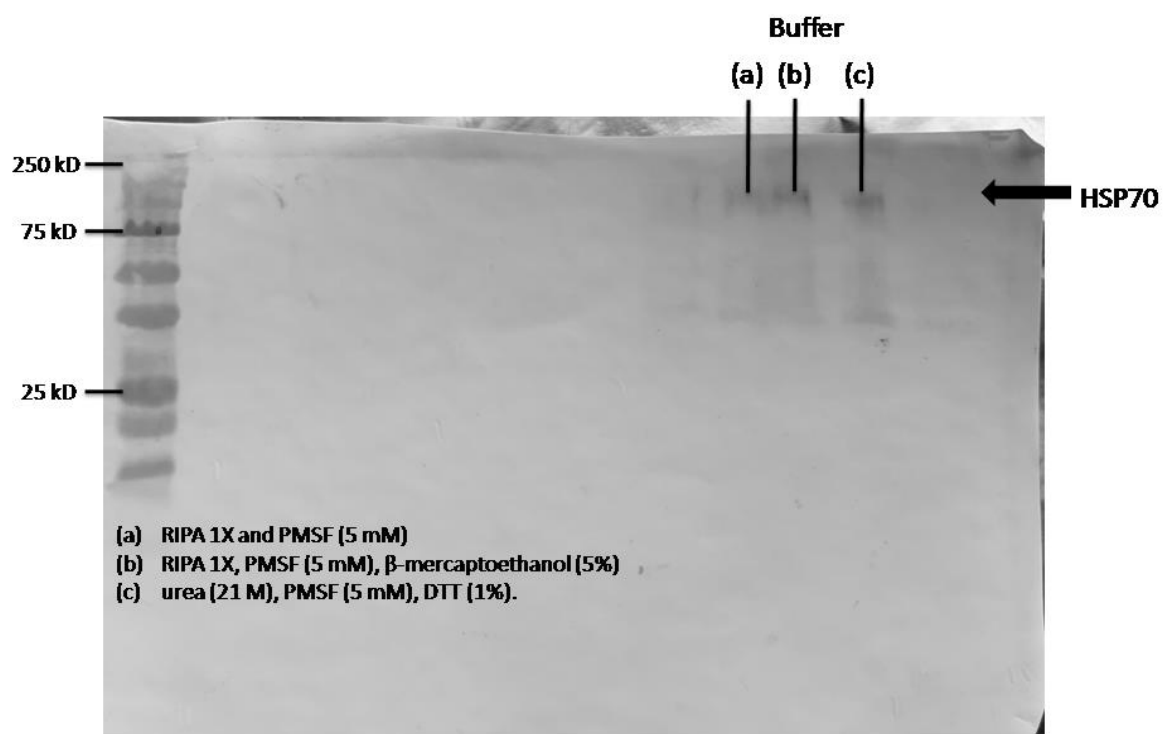

**Supplementary Fig. S2:** Nitrocellulose membrane claiming the presence of exosomal protein marker HSP70 in extracellular vesicles isolated from tobacco BY-2 suspension culture, using three different lysis buffers. Buffer (b) was selected for further western blot analysis.

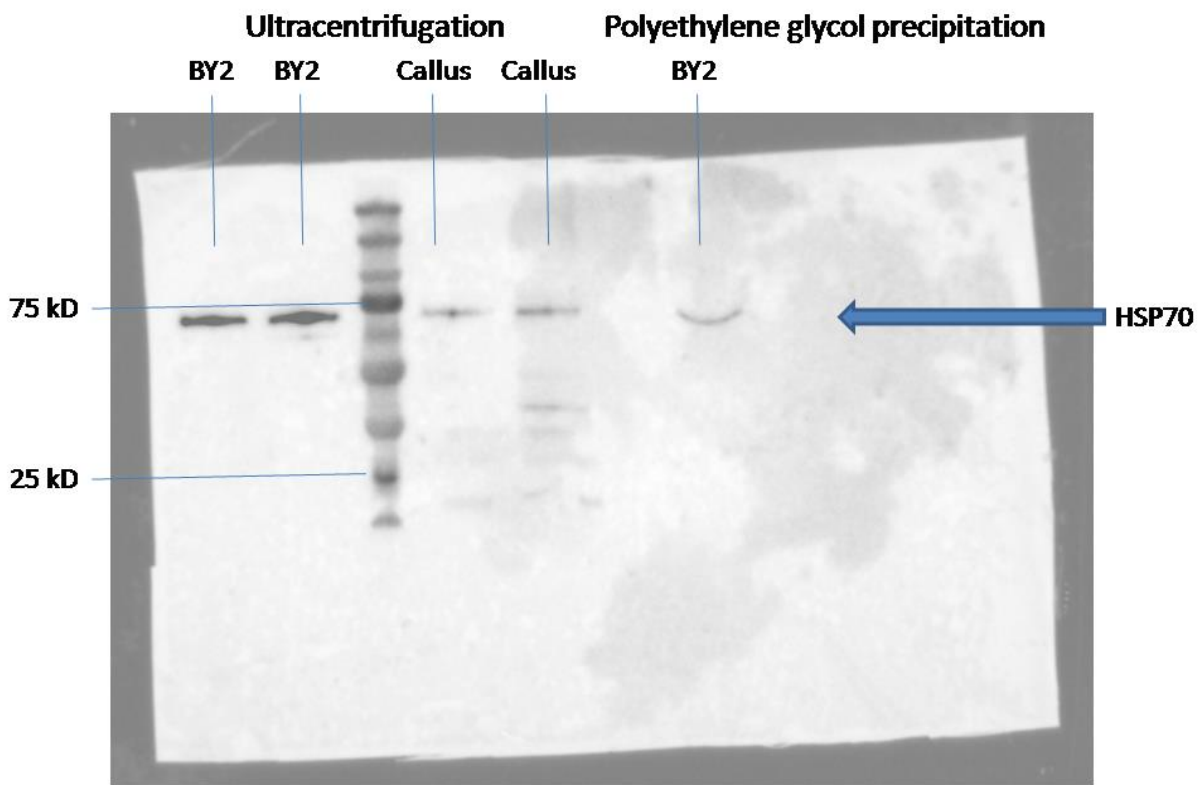

**Supplementary Fig. S3:** Nitrocellulose membrane claiming the presence of exosomal protein marker HSP70 in tobacco-derived vesicles isolated from tobacco callus and BY2 suspension cells by ultracentrifugation, as well as tobacco vesicles isolated from BY2 suspension culture by polyethylene glycol precipitation.
